# Supplementary material for: Lankesterella (Apicomplexa, Lankesterellidae) Blood Parasites of Passeriform Birds: Prevalence, Molecular and Morphological Characterization, with Notes on Sporozoite Persistence In Vivo and Development In Vitro
Source: MDPI journal article supplement (doi:10.3390/ani11051451), 2021-05-18
Supplement: s1 [file s1]

**Table S1.** GenBank accession numbers of partial *18S* rRNA gene sequences of vertebrate hosts and parasite species, which were used in the primers design of avian *Lankesterella*.

| <b>GenBank accession number</b> | <b>Organism (vertebrate host or parasite species)</b> |
|---------------------------------|-------------------------------------------------------|
| FJ688019                        | <i>Acipenser fulvescens</i>                           |
| AF494058                        | <i>Adelina bambarooniae</i>                           |
| DQ096835                        | <i>Adelina dimidiata</i>                              |
| DQ096836                        | <i>Adelina grylli</i>                                 |
| AF173605                        | <i>Alligator mississippiensis</i>                     |
| AF173614                        | <i>Anas platyrhynchos</i>                             |
| MH304758                        | Apicomplexa                                           |
| MH304760                        | Apicomplexa                                           |
| LK077046                        | <i>Apteryx australis</i>                              |
| AF173619                        | <i>Apus affinus</i>                                   |
| DQ227420                        | <i>Besnoitia besnoiti</i>                             |
| JF314861                        | <i>Besnoitia besnoiti</i>                             |
| AF173620                        | <i>Bubo virginianus</i>                               |
| MG590304                        | <i>Caloenas nicobarica</i>                            |
| KT184332                        | <i>Caryospora</i> cf.                                 |
| KT184331                        | <i>Caryospora</i> cf.                                 |
| AF173638                        | <i>Charadrius semipalmatus</i>                        |
| AF173622                        | <i>Chordeiles acutipennis</i>                         |
| HM117907                        | Coccidia                                              |
| HM117908                        | Coccidia                                              |
| AF173630                        | <i>Columba livia</i>                                  |
| AF173625                        | <i>Coracias caudata</i>                               |
| AF173611                        | <i>Coturnix pectoralis</i>                            |
| AJ311672                        | <i>Crocodylus niloticus</i>                           |
| AY954885                        | <i>Cryptosporidium andersoni</i>                      |
| DQ060422                        | <i>Cryptosporidium andersoni</i>                      |
| DQ060421                        | <i>Cryptosporidium baileyi</i>                        |
| EU162754                        | <i>Cryptosporidium fragile</i>                        |
| EU162752                        | <i>Cryptosporidium fragile</i>                        |
| AF093497                        | <i>Cryptosporidium muris</i>                          |
| AB089284                        | <i>Cryptosporidium muris</i>                          |
| X64343                          | <i>Cryptosporidium muris</i>                          |
| AY642591                        | <i>Cryptosporidium muris</i>                          |
| X64341                          | <i>Cryptosporidium parvum</i>                         |
| X64340                          | <i>Cryptosporidium parvum</i>                         |
| AF093499                        | <i>Cryptosporidium serpentis</i>                      |
| AF093501                        | <i>Cryptosporidium serpentis</i>                      |
| AF093500                        | <i>Cryptosporidium serpentis</i>                      |
| AF513227                        | <i>Cryptosporidium</i> sp.                            |
| AF173628                        | <i>Cuculus pallidus</i>                               |
| KT184368                        | <i>Cystoisospora canis</i>                            |
| AY618555                        | <i>Cystoisospora</i> cf                               |
| AB519675                        | <i>Cystoisospora</i> sp.                              |
| AY279205                        | <i>Cystoisospora timoni</i>                           |
| MG590305                        | <i>Didunculus strigirostris</i>                       |

---

|          |                              |
|----------|------------------------------|
| DQ538351 | <i>Eimeria acervulina</i>    |
| EF210323 | <i>Eimeria acervulina</i>    |
| KC305176 | <i>Eimeria adenoeides</i>    |
| KC305170 | <i>Eimeria adenoeides</i>    |
| KC305180 | <i>Eimeria adenoeides</i>    |
| AB769547 | <i>Eimeria alabamensis</i>   |
| AY613853 | <i>Eimeria arnyi</i>         |
| AB769566 | <i>Eimeria auburnensis</i>   |
| AB769563 | <i>Eimeria auburnensis</i>   |
| AB769583 | <i>Eimeria bovis</i>         |
| AB769600 | <i>Eimeria bukidnonensis</i> |
| AB769602 | <i>Eimeria canadensis</i>    |
| MF860827 | <i>Eimeria</i> cf.           |
| MF860826 | <i>Eimeria</i> cf.           |
| FJ236374 | <i>Eimeria</i> cf.           |
| KT184339 | <i>Eimeria falciformis</i>   |
| KT184341 | <i>Eimeria gallopavonis</i>  |
| KC305187 | <i>Eimeria meleagriditis</i> |
| KT184350 | <i>Eimeria papillata</i>     |
| HM117016 | <i>Eimeria</i> sp.           |
| AB769636 | <i>Eimeria subspherica</i>   |
| AF026388 | <i>Eimeria tenella</i>       |
| DQ136183 | <i>Eimeria tenella</i>       |
| GU479674 | <i>Eimeria variabilis</i>    |
| AB769647 | <i>Eimeria wyomingensis</i>  |
| AB769657 | <i>Eimeria zuernii</i>       |
| AB769659 | <i>Eimeria zuernii</i>       |
| KT956976 | <i>Eimeriidae</i>            |
| NR46271  | <i>Equus caballus</i>        |
| AF009245 | <i>Frenkelia glareoli</i>    |
| AF173624 | <i>Galbula pastazae</i>      |
| KT445934 | <i>Gallus gallus</i>         |
| MG590306 | <i>Goura cristata</i>        |
| MG590323 | <i>Goura victoria</i>        |
| AY043206 | <i>Goussia janae</i>         |
| MH758784 | <i>Goussia</i> sp.           |
| MH758783 | <i>Goussia</i> sp.           |
| GU479656 | <i>Goussia szekelyi</i>      |
| AF173632 | <i>Grus canadenses</i>       |
| HQ224959 | <i>Haemogregarina balli</i>  |
| KF854253 | <i>Hammondia hammondi</i>    |
| KP881349 | <i>Hemolivia stellata</i>    |
| MG758136 | <i>Hepatozoon banethi</i>    |
| MG758137 | <i>Hepatozoon banethi</i>    |
| MG758133 | <i>Hepatozoon banethi</i>    |
| AY461375 | <i>Hepatozoon canis</i>      |
| AY461376 | <i>Hepatozoon canis</i>      |
| KX712128 | <i>Hepatozoon canis</i>      |
| LC169075 | <i>Hepatozoon canis</i>      |

---

---

|          |                              |
|----------|------------------------------|
| KU893123 | <i>Hepatozoon canis</i>      |
| KU893125 | <i>Hepatozoon canis</i>      |
| KU893121 | <i>Hepatozoon canis</i>      |
| EU289222 | <i>Hepatozoon canis</i>      |
| AY731062 | <i>Hepatozoon canis</i>      |
| HQ224954 | <i>Hepatozoon</i> cf.        |
| HQ224962 | <i>Hepatozoon</i> cf.        |
| HQ224963 | <i>Hepatozoon</i> cf.        |
| MG593275 | <i>Hepatozoon ewingi</i>     |
| KX017290 | <i>Hepatozoon felis</i>      |
| MG041594 | <i>Hepatozoon involucrum</i> |
| MG041591 | <i>Hepatozoon involucrum</i> |
| MG041593 | <i>Hepatozoon involucrum</i> |
| MG041592 | <i>Hepatozoon involucrum</i> |
| MG136687 | <i>Hepatozoon martis</i>     |
| JN181157 | <i>Hepatozoon sipedon</i>    |
| KF022102 | <i>Hepatozoon peircei</i>    |
| MF541372 | <i>Hepatozoon</i> sp.        |
| AB181504 | <i>Hepatozoon</i> sp.        |
| FJ719818 | <i>Hepatozoon</i> sp.        |
| FJ719817 | <i>Hepatozoon</i> sp.        |
| FJ719815 | <i>Hepatozoon</i> sp.        |
| FJ719816 | <i>Hepatozoon</i> sp.        |
| FJ719819 | <i>Hepatozoon</i> sp.        |
| AY600626 | <i>Hepatozoon</i> sp.        |
| AY600625 | <i>Hepatozoon</i> sp.        |
| JX644997 | <i>Hepatozoon</i> sp.        |
| JX644996 | <i>Hepatozoon</i> sp.        |
| KU680465 | <i>Hepatozoon</i> sp.        |
| KU680466 | <i>Hepatozoon</i> sp.        |
| KU680461 | <i>Hepatozoon</i> sp.        |
| KJ413113 | <i>Hepatozoon</i> sp.        |
| KJ413132 | <i>Hepatozoon</i> sp.        |
| JX644998 | <i>Hepatozoon</i> sp.        |
| FJ719813 | <i>Hepatozoon</i> sp.        |
| FJ719814 | <i>Hepatozoon</i> sp.        |
| MH174343 | <i>Hepatozoon</i> sp.        |
| EF222259 | <i>Hepatozoon</i> sp.        |
| EF222257 | <i>Hepatozoon</i> sp.        |
| KU198330 | <i>Hepatozoon</i> sp.        |
| LC169077 | <i>Hepatozoon</i> sp.        |
| HQ224960 | <i>Hepatozoon</i> sp.        |
| MG519502 | <i>Hepatozoon</i> sp.        |
| MG519501 | <i>Hepatozoon</i> sp.        |
| MG519504 | <i>Hepatozoon</i> sp.        |
| KU680463 | <i>Hepatozoon</i> sp.        |
| KU680462 | <i>Hepatozoon</i> sp.        |
| AY461377 | <i>Hepatozoon</i> sp.        |
| MG041596 | <i>Hepatozoon tenuis</i>     |

---

---

|          |                                   |
|----------|-----------------------------------|
| MG041597 | <i>Hepatozoon tenuis</i>          |
| MG041595 | <i>Hepatozoon tenuis</i>          |
| MG041599 | <i>Hepatozoon tenuis</i>          |
| MG041602 | <i>Hepatozoon thori</i>           |
| MG041600 | <i>Hepatozoon thori</i>           |
| MG041601 | <i>Hepatozoon thori</i>           |
| MF164258 | <i>Homo sapiens</i>               |
| DQ060658 | <i>Isospora belli</i>             |
| AF106935 | <i>Isospora belli</i>             |
| L76471   | <i>Isospora felis</i>             |
| AF080612 | <i>Isospora robini</i>            |
| HQ224955 | <i>Klossia helicina</i>           |
| HQ224956 | <i>Klossia helicina</i>           |
| MG808274 | <i>Lankesterella</i> sp.          |
| MG808272 | <i>Lankesterella</i> sp.          |
| MG808273 | <i>Lankesterella</i> sp.          |
| DQ390207 | <i>Lankesterella valsainensis</i> |
| AF173637 | <i>Larus glaucoides</i>           |
| AY217921 | <i>Melanoseps occidentalis</i>    |
| AJ419877 | <i>Meleagris gallopavo</i>        |
| AF173618 | <i>Musophaga porphyreolopha</i>   |
| AJ271354 | <i>Neospora caninum</i>           |
| U16159   | <i>Neospora caninum</i>           |
| EU334134 | <i>Nephroisospora eptesici</i>    |
| AF173606 | <i>Nothoprocta ornata</i>         |
| AF173613 | <i>Ortalis guttata</i>            |
| AY305326 | <i>Perkinsus andrewsi</i>         |
| AF102171 | <i>Perkinsus andrewsi</i>         |
| AF509333 | <i>Perkinsus atlanticus</i>       |
| KX514016 | <i>Perkinsus olseni</i>           |
| KX513987 | <i>Perkinsus olseni</i>           |
| AF252288 | <i>Perkinsus</i> sp.              |
| L07375   | <i>Perkinsus</i> sp.              |
| AF173615 | <i>Picoides pubescens</i>         |
| EU282018 | <i>Sarcocystis alces</i>          |
| MF596236 | <i>Sarcocystis arctica</i>        |
| MF596228 | <i>Sarcocystis arctica</i>        |
| MF596220 | <i>Sarcocystis arctica</i>        |
| KX022102 | <i>Sarcocystis arctica</i>        |
| MF039330 | <i>Sarcocystis arieticanis</i>    |
| MH413035 | <i>Sarcocystis arieticanis</i>    |
| KT901132 | <i>Sarcocystis bovifelis</i>      |
| KT901153 | <i>Sarcocystis bovini</i>         |
| KT901142 | <i>Sarcocystis bovini</i>         |
| KY019021 | <i>Sarcocystis capreolicanis</i>  |
| KY019027 | <i>Sarcocystis capreolicanis</i>  |
| JN256129 | <i>Sarcocystis capreolicanis</i>  |
| KY019024 | <i>Sarcocystis capreolicanis</i>  |
| KY019023 | <i>Sarcocystis capreolicanis</i>  |

---

---

|          |                                  |
|----------|----------------------------------|
| JN226118 | <i>Sarcocystis capreolicanis</i> |
| KY973342 | <i>Sarcocystis cervicanis</i>    |
| KY973339 | <i>Sarcocystis cervicanis</i>    |
| KY973333 | <i>Sarcocystis cervicanis</i>    |
| HM125054 | <i>Sarcocystis columbae</i>      |
| LC171829 | <i>Sarcocystis cruzi</i>         |
| JX679467 | <i>Sarcocystis cruzi</i>         |
| GQ251013 | <i>Sarcocystis elongata</i>      |
| MF596181 | <i>Sarcocystis entzerothi</i>    |
| MF596180 | <i>Sarcocystis entzerothi</i>    |
| KX643337 | <i>Sarcocystis entzerothi</i>    |
| KY019030 | <i>Sarcocystis gracilis</i>      |
| JN256131 | <i>Sarcocystis gracilis</i>      |
| FJ196261 | <i>Sarcocystis gracilis</i>      |
| JN256128 | <i>Sarcocystis hjorti</i>        |
| AY015113 | <i>Sarcocystis lacertae</i>      |
| JQ733508 | <i>Sarcocystis lari</i>          |
| KU247921 | <i>Sarcocystis levinei</i>       |
| KU247914 | <i>Sarcocystis levinei</i>       |
| KY973357 | <i>Sarcocystis linearis</i>      |
| KY973361 | <i>Sarcocystis linearis</i>      |
| KY973365 | <i>Sarcocystis linearis</i>      |
| KY019041 | <i>Sarcocystis linearis</i>      |
| KY019035 | <i>Sarcocystis linearis</i>      |
| KY019045 | <i>Sarcocystis linearis</i>      |
| KY973358 | <i>Sarcocystis linearis</i>      |
| KY019053 | <i>Sarcocystis linearis</i>      |
| MF596216 | <i>Sarcocystis lutrae</i>        |
| KY973375 | <i>Sarcocystis morae</i>         |
| KY973379 | <i>Sarcocystis morae</i>         |
| M64244   | <i>Sarcocystis muris</i>         |
| EF467655 | <i>Sarcocystis rangi</i>         |
| GQ250978 | <i>Sarcocystis rangiferi</i>     |
| GQ250985 | <i>Sarcocystis rangiferi</i>     |
| HM185742 | <i>Sarcocystis rileyi</i>        |
| EU282021 | <i>Sarcocystis scandinavica</i>  |
| EU282025 | <i>Sarcocystis scandinavica</i>  |
| EU282026 | <i>Sarcocystis scandinavica</i>  |
| KY019060 | <i>Sarcocystis silva</i>         |
| KY019058 | <i>Sarcocystis silva</i>         |
| JN256132 | <i>Sarcocystis silva</i>         |
| KY019063 | <i>Sarcocystis silva</i>         |
| KT901096 | <i>Sarcocystis sinensis</i>      |
| KT901106 | <i>Sarcocystis sinensis</i>      |
| KT901105 | <i>Sarcocystis sinensis</i>      |
| KT901103 | <i>Sarcocystis sinensis</i>      |
| KT901108 | <i>Sarcocystis sinensis</i>      |
| GQ245670 | <i>Sarcocystis</i> sp.           |
| AB691780 | <i>Sarcocystis</i> sp.           |

---

---

|          |                                  |
|----------|----------------------------------|
| KF309698 | <i>Sarcocystis</i> sp.           |
| AB257162 | <i>Sarcocystis</i> sp.           |
| JN256133 | <i>Sarcocystis</i> sp.           |
| KF831281 | <i>Sarcocystis taeniata</i>      |
| KF831292 | <i>Sarcocystis taeniata</i>      |
| KF831282 | <i>Sarcocystis taeniata</i>      |
| EF056012 | <i>Sarcocystis tarandivulpes</i> |
| EF467657 | <i>Sarcocystis tarandivulpes</i> |
| KP263758 | <i>Sarcocystis tenella</i>       |
| KP263753 | <i>Sarcocystis tenella</i>       |
| GQ251022 | <i>Sarcocystis truncata</i>      |
| GQ251029 | <i>Sarcocystis truncata</i>      |
| KY973325 | <i>Sarcocystis venatoria</i>     |
| KY973324 | <i>Sarcocystis venatoria</i>     |
| KY973328 | <i>Sarcocystis venatoria</i>     |
| KU244524 | <i>Sarcocystis zamani</i>        |
| AJ419876 | <i>Struthio camelus</i>          |
| NR46261  | <i>Sus scrofa</i>                |
| AF173626 | <i>Tockus nasutus</i>            |
| EF472967 | <i>Toxoplasma gondii</i>         |
| KX008020 | <i>Toxoplasma gondii</i>         |
| KX008008 | <i>Toxoplasma gondii</i>         |
| AF173623 | <i>Trogon collaris</i>           |
| AF173631 | <i>Turnix sylvatica</i>          |
| AF173616 | <i>Tyrannus tyrannus</i>         |
| KP404891 | Uncultured eukaryote             |
| KP404707 | Uncultured eukaryote             |
| KP404652 | Uncultured eukaryote             |
| AF173627 | <i>Upupa epops</i>               |
| AF173617 | <i>Urocolius macrourus</i>       |
| X02995   | <i>Xenopus laevis</i>            |

---
