# Supplementary material for: Lankesterella (Apicomplexa, Lankesterellidae) Blood Parasites of Passeriform Birds: Prevalence, Molecular and Morphological Characterization, with Notes on Sporozoite Persistence In Vivo and Development In Vitro
Source: MDPI journal article supplement (doi:10.3390/ani11051451), 2021-05-18
Supplement: s1 [file s1]

**Table S2.** GenBank accession numbers of partial *18S* rRNA gene sequences and parasite species used in the phylogenetic analysis of avian *Lankesterella* (see Fig. 5).

| <b>GenBank accession number</b> | <b>Parasite species</b>          |
|---------------------------------|----------------------------------|
| AF109678                        | <i>Besnoitia besnoiti</i>        |
| EF210324                        | <i>Eimeria acervulina</i>        |
| AF324212                        | <i>Eimeria adeneodei</i>         |
| U67116                          | <i>Eimeria brunetti</i>          |
| KT184338                        | <i>Eimeria dispersa</i>          |
| KT184344                        | <i>Eimeria gallopavonis</i>      |
| EF210322                        | <i>Eimeria máxima</i>            |
| AF041437                        | <i>Eimeria meleagriditis</i>     |
| U40262                          | <i>Eimeria mitis</i>             |
| KT184349                        | <i>Eimeria necatrix</i>          |
| AF026388                        | <i>Eimeria tenella</i>           |
| AF009245                        | <i>Frenkelia glareoli</i>        |
| AF009244                        | <i>Frenkelia microti</i>         |
| FJ009242                        | <i>Goussia neglecta</i>          |
| FJ009241                        | <i>Goussia noelleri</i>          |
| HQ224959                        | <i>Haemogregarina balli</i>      |
| KM887508                        | <i>Haemogregarina pellegrini</i> |
| KF257927                        | <i>Haemogregarina stepanowi</i>  |
| MK650632                        | <i>Haemoproteus columbae</i>     |
| KT184369                        | <i>Hammondia hammondi</i>        |
| HQ224961                        | <i>Hemolivia mariae</i>          |
| KF992706                        | <i>Hemolivia mauritanica</i>     |
| KP881349                        | <i>Hemolivia stellata</i>        |
| AF176836                        | <i>Hepatozoon americanum</i>     |
| AY461378                        | <i>Hepatozoon canis</i>          |
| AF176837                        | <i>Hepatozoon catesbianae</i>    |
| AY620232                        | <i>Hepatozoon felis</i>          |
| JN181157                        | <i>Hepatozoon sipedon</i>        |
| KF022102                        | <i>Hepatozoon peircei</i>        |
| KF648870                        | <i>Isospora greineri</i>         |
| AF080612                        | <i>Isospora robini</i>           |
| KF648871                        | <i>Isospora superbusi</i>        |
| AF080611                        | <i>Lankesterella mínima</i>      |
| MF167547                        | <i>Lankesterella</i> sp.         |
| MF167548                        | <i>Lankesterella</i> sp.         |
| KU180248                        | <i>Lankesterella</i> sp.         |
| MF167544                        | <i>Lankesterella</i> sp.         |
| MF167555                        | <i>Lankesterella</i> sp.         |
| MF167552                        | <i>Lankesterella</i> sp.         |
| MF167554                        | <i>Lankesterella</i> sp.         |
| KJ131417                        | <i>Lankesterella</i> sp.         |
| MF167545                        | <i>Lankesterella</i> sp.         |
| MF167546                        | <i>Lankesterella</i> sp.         |
| MF167549                        | <i>Lankesterella</i> sp.         |
| MF167551                        | <i>Lankesterella</i> sp.         |
| MF167550                        | <i>Lankesterella</i> sp.         |
| MF167553                        | <i>Lankesterella</i> sp.         |
| MG808272                        | <i>Lankesterella</i> sp.         |
| MG808274                        | <i>Lankesterella</i> sp.         |

---

|          |                                    |
|----------|------------------------------------|
| MG808273 | <i>Lankesterella sp.</i>           |
| DQ390207 | <i>Lankesterella valsainensis</i>  |
| MK650741 | <i>Leucocytozoon sp.</i>           |
| MK650564 | <i>Plasmodium elongatum</i>        |
| MK650600 | <i>Plasmodium homocircumflexum</i> |
| MK650484 | <i>Plasmodium relictum</i>         |
| AF017121 | <i>Sarcocystis buffalonis</i>      |
| AF017120 | <i>Sarcocystis cruzi</i>           |
| AF017122 | <i>Sarcocystis hirsuta</i>         |
| AF006470 | <i>Sarcocystis hominis</i>         |
| KJ131415 | <i>Schellackia bolivari</i>        |
| KJ131414 | <i>Schellackia orientalis</i>      |
| L37415   | <i>Toxoplasma gondii</i>           |

---
